# Supplementary material
Source: MDPI journal article supplement (https://www.mdpi.com/1996-1073/11/3/516)
Supplement: s1 [file s1]

## Supplementary material

Article

# Mechanical and Alkaline Hydrothermal Treated Corn Residue Conversion into Bioenergy and Biofertilizer: A Resource Recovery Concept

Subhash Paul, Animesh Dutta\* and Fantahun Defersha

School of Engineering, University of Guelph, ON, N1G2W1, Canada; paulchsubhash@yahoo.ca (S.P.); fdefersh@uoguelph.ca (F.D.)

\* Correspondence: adutta@uoguelph.ca

Received: 18 January 2018; Accepted: 23 February 2018; Published: 28 February 2018

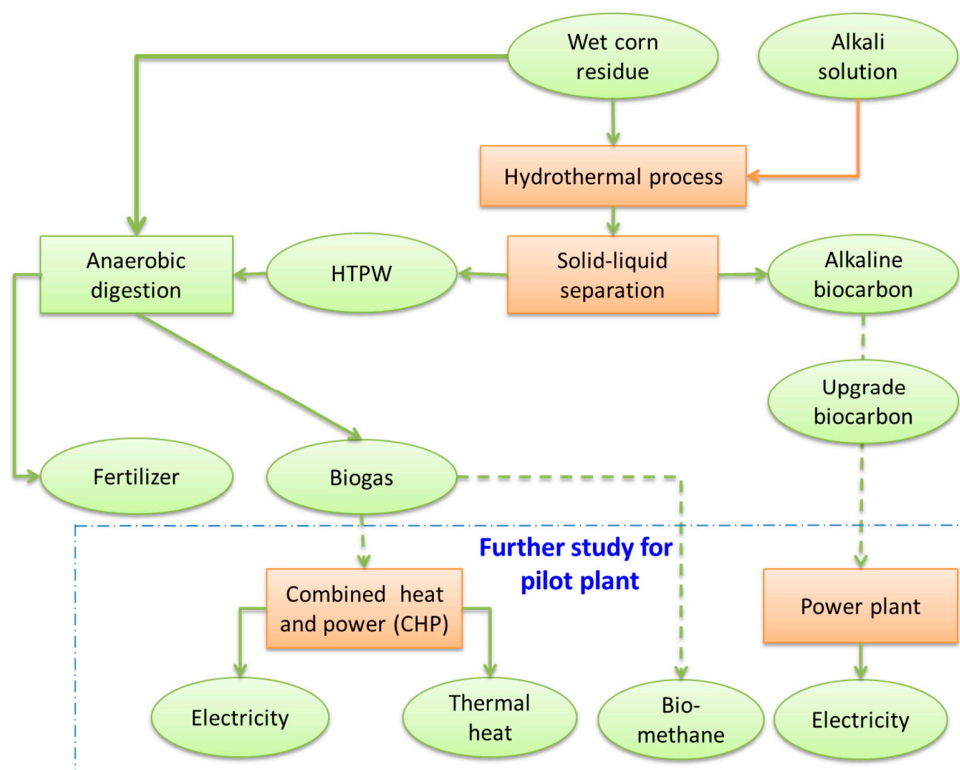

**Figure S1.** Further study for hybrid bioenergy conversion from corn residue in the resource recovery concept.
